# Supplementary material for: Iron (III)-Quercetin Complex: Synthesis, Physicochemical Characterization, and MRI Cell Tracking toward Potential Applications in Regenerative Medicine
Source: Contrast Media Mol Imaging. 2020 Dec 29;2020:8877862. doi: 10.1155/2020/8877862 (PMC7785384; doi:10.1155/2020/8877862)
Supplement: Supplementary Materials — Figure S1: 1H NMR spectra for quercetin. Figure S2: 1H NMR spectra for deprotonated quercetin. Figure S3: 1H NMR spectra for IronQ. [file 8877862.f1.docx]

**Supplementary Materials**

**Iron(III)–Quercetin Complex: Synthesis, Physicochemical Characterization, and MRI Cell Tracking Toward Potential Applications in Regenerative Medicine**

Phakorn Papan1,2, Jiraporn Kantapan1, Padchanee Sangthong2, Puttinan Meepowpan2, Nathupakorn Dechsupa1*

1Research Unit of Molecular Imaging Probes, Department of Radiologic Technology, Faculty of Associated Medical Sciences, Chiang Mai University, Chiang Mai 50200, Thailand

2Department of Chemistry, Faculty of Science, Chiang Mai University, Chiang Mai 50200, Thailand

* Corresponding Author

Nathupakorn Dechsupa

Email: [nathupakorn.d@cmu.ac.th](mailto:nathupakorn.d@cmu.ac.th)

**Details of supporting information:**

Number of pages: 4

Number of supporting figures: 3


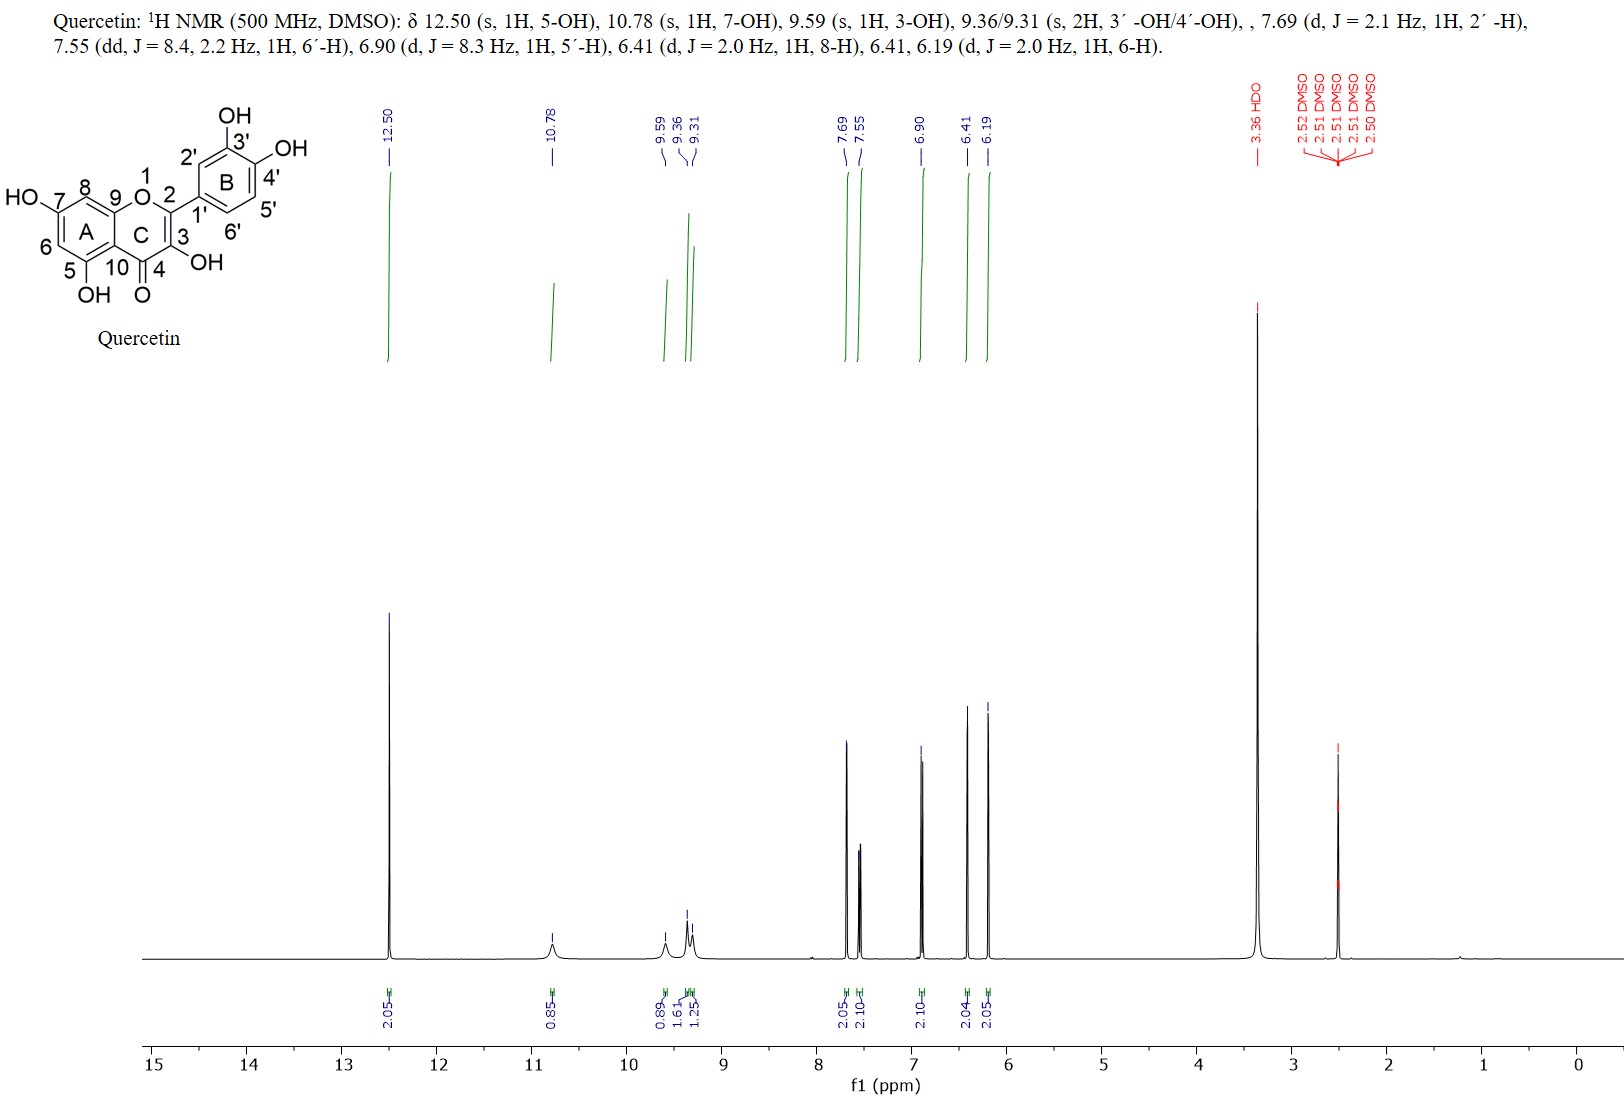


Figure S1: 1H-NMR (500 MHz, DMSO) of quercetin.

**
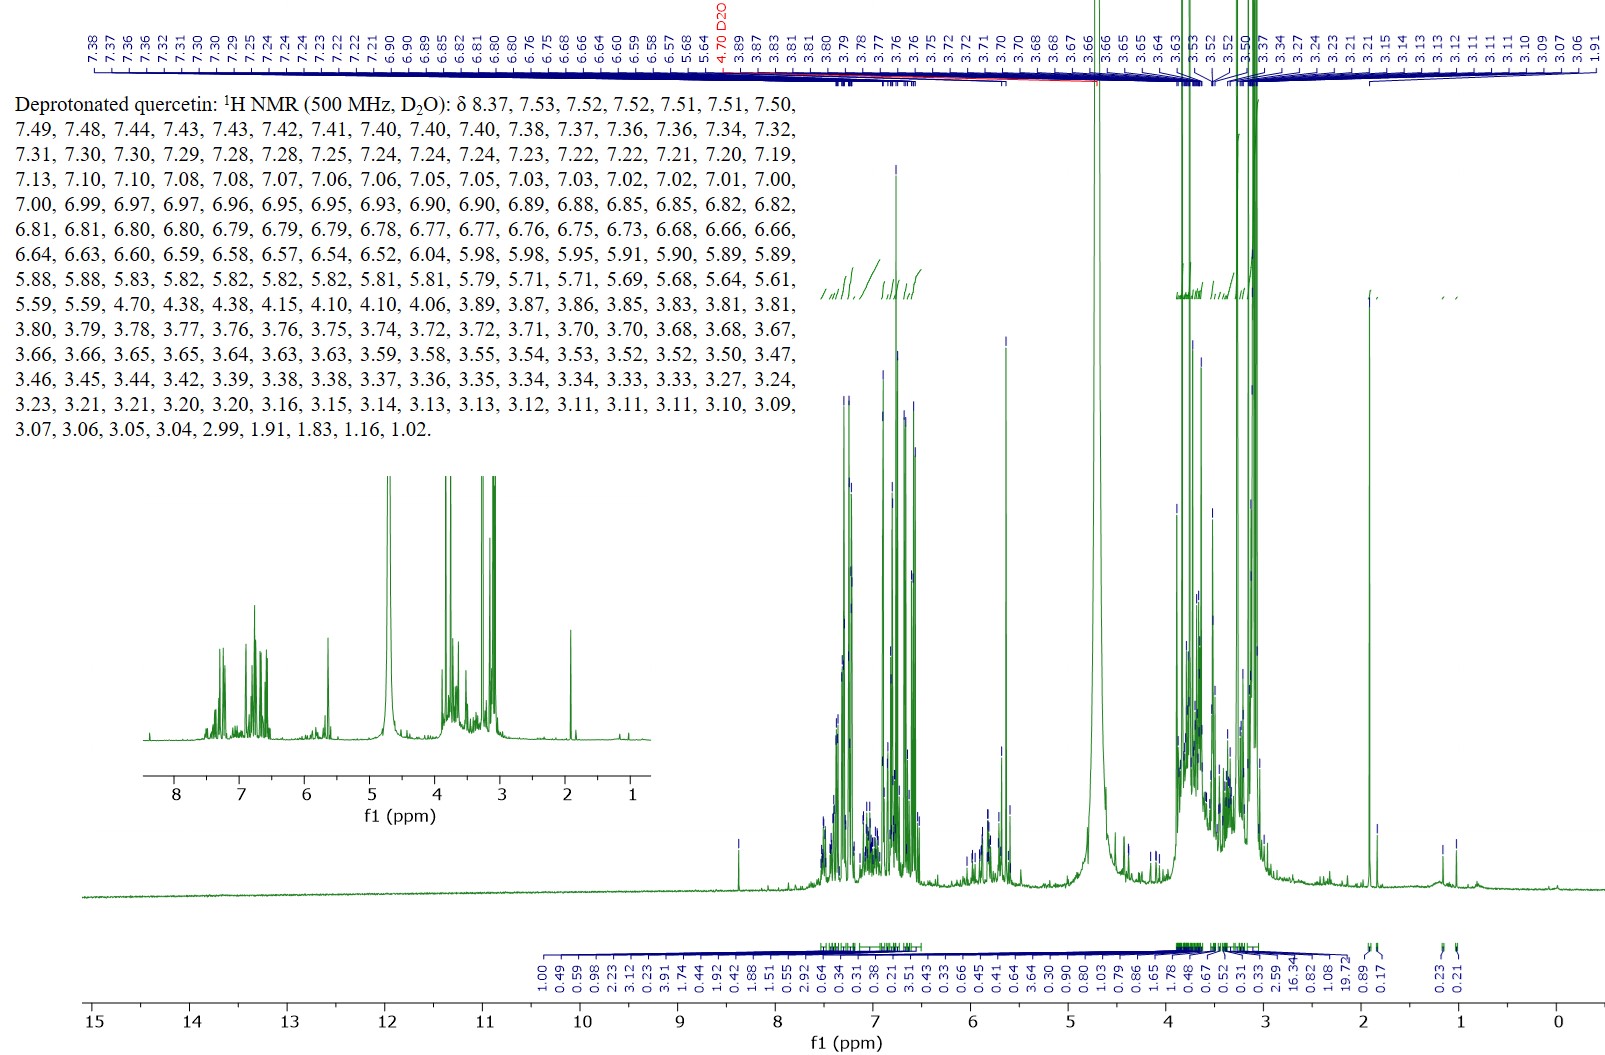
**

Figure S2: 1H-NMR (500 MHz, D2O) of deprotonated quercetin.

**
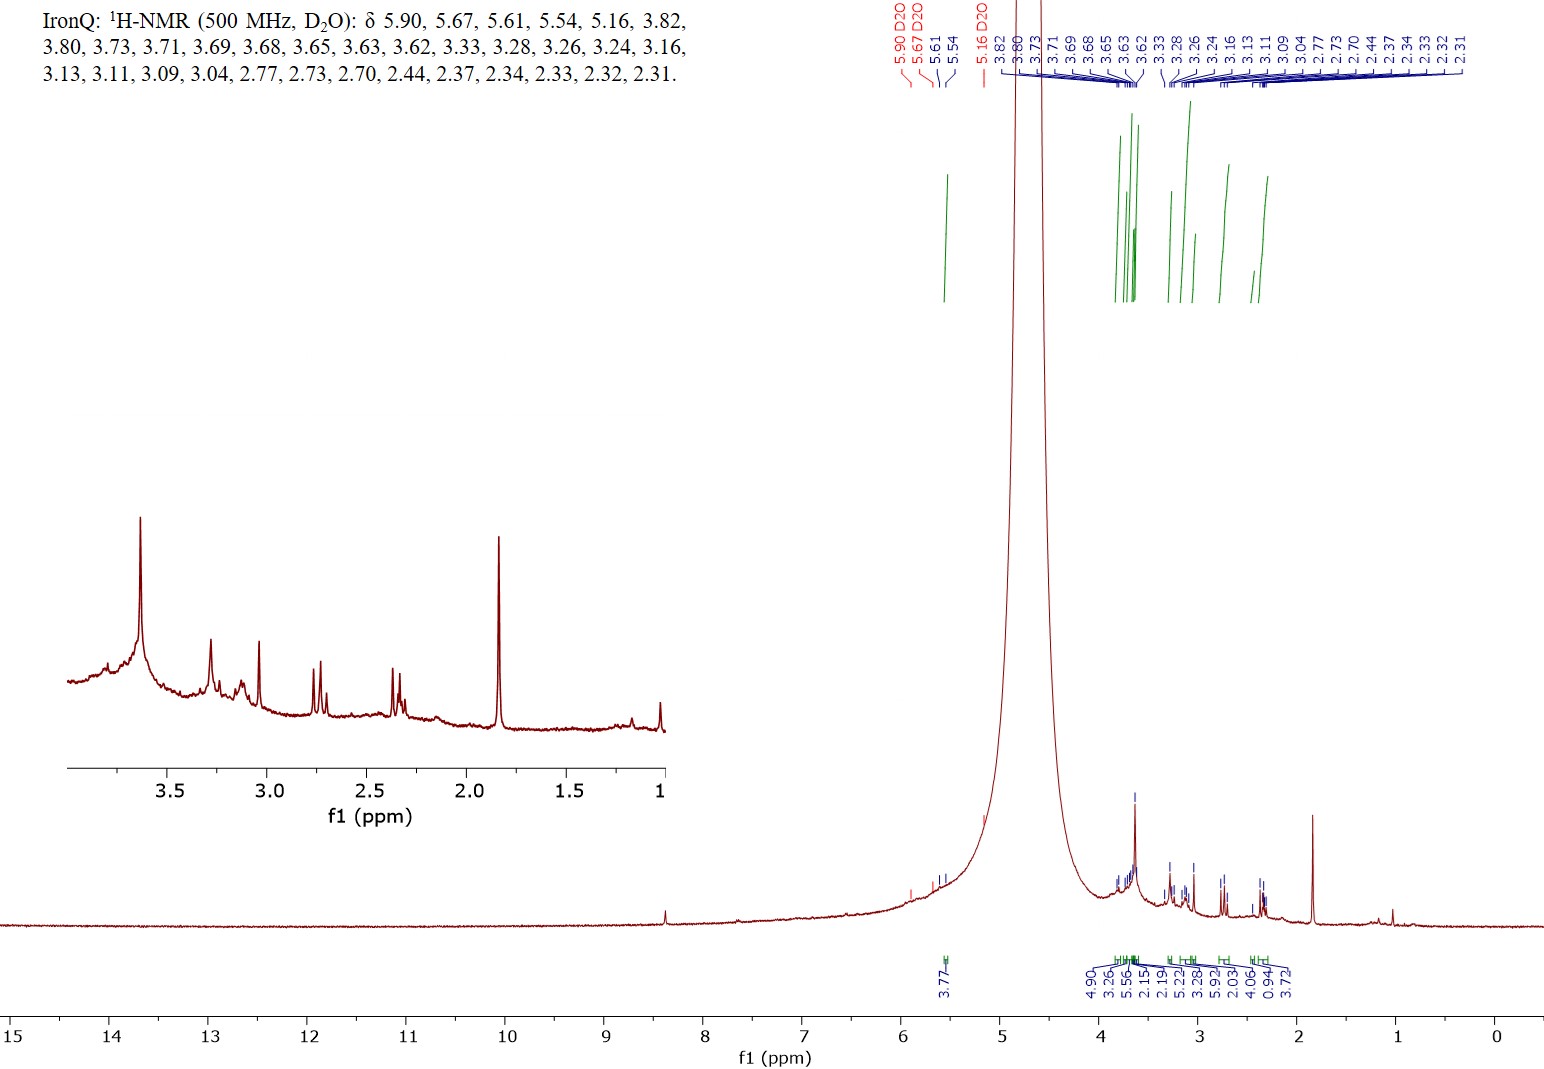
**

Figure S3: 1H-NMR (500 MHz, D2O) of IronQ.
